# Supplementary material for: Linking Subsidies for Agriculture and Food to Dietary Styles: Estimates for Switzerland
Source: MDPI journal article supplement (doi:10.3390/su151310428), 2023-07-02
Supplement: s1 [file s1]

## Supplementary materials

Table S1. Breakdown of impact by impact categories for Swiss agriculture following the method of ecological scarcity.

| Impact category                  | Impact in 10 <sup>6</sup> eco-points |
|----------------------------------|--------------------------------------|
| Water consumption                | 54'777                               |
| Energy resources                 | 1'014'224                            |
| Minerals                         | 86'419                               |
| Land use                         | 6'997'502                            |
| Climate change                   | 8'253'094                            |
| Ozone layer depletion            | 7'303                                |
| Air pollutants and dust          | 2'581'118                            |
| Carcinogenic air pollutants      | 29'158                               |
| Heavy metals in air              | 247'813                              |
| Water pollutants                 | 3'838'530                            |
| POP into the water               | 37'993                               |
| Heavy metals in water            | 71'383                               |
| Plant protection products        | 4'119'088                            |
| Heavy metals in soil             | -95'154 <sup>b</sup>                 |
| Radioactive substances in air    | 24                                   |
| Radioactive substances in seas   | 31'649                               |
| Noise                            | 53'791                               |
| Landfilled non-radioactive waste | 102'088                              |
| Landfilled radioactive waste     | 664'221                              |
| Marine fish resources            | 32'538                               |
| <b>Total</b>                     | <b>28'127'559</b>                    |

<sup>a</sup> Frischknecht et al. (2021).

<sup>b</sup> The negative value arises from the feeding of grass, hay or silage in the production of dairy products. Heavy metals are removed from the soil during the growth cultivation of grass.

Source: ESU Services, data 2020.

Table S2. Breakdown of impact (in eco-points) by impact categories for the dietary styles following the method of ecological scarcity <sup>a</sup>.

| Impact category                         | Average            | Environmentally optimized | vegan              | Ovo-lacto-vegetarian | Ovo-lacto-Pescetarian | Flexitarian        | Protein-focused    | Meat-focused       |
|-----------------------------------------|--------------------|---------------------------|--------------------|----------------------|-----------------------|--------------------|--------------------|--------------------|
| Water consumption                       | 25'426.7           | 19'493.2                  | 25'792.4           | 27'155.5             | 26'219.3              | 25'547.0           | 25'257.8           | 21'687.8           |
| Energy resources                        | 190'626.9          | 96'855.7                  | 94'318.3           | 116'018.7            | 140'732.9             | 139'282.5          | 278'952.9          | 270'858.5          |
| Minerals                                | 14'109.5           | 7'318.0                   | 5'417.5            | 8'221.0              | 8'614.8               | 9'943.9            | 21'883.0           | 21'432.7           |
| Land use                                | 1'282'437.9        | 633'070.5                 | 544'161.1          | 731'599.7            | 742'117.1             | 894'234.0          | 1'890'991.1        | 1'975'307.5        |
| Climate change                          | 1'519'829.8        | 820'485.0                 | 723'470.0          | 933'269.8            | 1'135'727.4           | 1'115'880.6        | 2'241'625.8        | 2'148'096.5        |
| Ozone layer depletion                   | 1'573.8            | 785.9                     | 946.3              | 1'144.0              | 1'278.6               | 1'269.5            | 2'271.5            | 2'016.9            |
| Air pollutants and dust                 | 499'858.1          | 256'355.9                 | 186'230.4          | 266'059.3            | 359'948.5             | 340'246.8          | 734'144.4          | 741'405.9          |
| Carcinogenic air pollutants             | 6'680.1            | 3'452.6                   | 4'690.6            | 4'745.4              | 5'506.5               | 5'303.1            | 9'013.6            | 8'791.1            |
| Heavy metals in air                     | 45'803.5           | 24'446.1                  | 23'191.1           | 29'125.9             | 32'351.8              | 34'016.6           | 67'916.7           | 65'366.8           |
| Water pollutants                        | 771'658.7          | 433'624.4                 | 420'154.3          | 539'239.2            | 570'581.1             | 591'005.2          | 1'131'816.7        | 1'086'972.5        |
| POP into the water                      | 11'796.9           | 5'646.7                   | 8'319.9            | 8'406.9              | 12'528.0              | 9'634.4            | 13'958.5           | 13'576.2           |
| Heavy metals in water                   | 13'104.3           | 7'059.2                   | 6'729.5            | 8'351.2              | 9'171.6               | 9'750.4            | 19'083.3           | 18'611.2           |
| Plant protection products               | 1'365'566.0        | 899'023.0                 | 1'317'636.9        | 1'330'470.7          | 1'356'226.7           | 1'311'062.2        | 1'339'698.7        | 1'330'125.0        |
| Heavy metals in soil                    | 40'776.8           | 22'719.4                  | 69'709.6           | 63'927.0             | 67'734.0              | 54'395.8           | 21'841.1           | 13'865.8           |
| Radioactive substances in air           | 4.1                | 2.1                       | 2.0                | 2.5                  | 2.6                   | 2.9                | 6.4                | 6.2                |
| Radioactive substances in seas          | 5'643.4            | 2'831.1                   | 3'047.5            | 3'500.1              | 3'764.6               | 4'111.3            | 8'593.9            | 8'345.7            |
| Noise                                   | 12'506.8           | 6'909.8                   | 8'484.2            | 10'043.5             | 10'469.6              | 10'431.8           | 17'088.3           | 16'591.4           |
| Landfilled non-radioactive waste        | 32'034.8           | 13'993.3                  | 25'742.5           | 26'416.1             | 27'670.4              | 27'698.1           | 40'727.5           | 38'895.8           |
| Landfilled radioactive waste            | 118'353.1          | 59'249.1                  | 60'027.9           | 71'810.6             | 78'541.1              | 85'363.2           | 180'555.3          | 175'593.5          |
| Marine fish resources                   | 14'152.9           | 9'108.2                   | 368.7              | 1'725.9              | 18'470.1              | 6'969.5            | 18'004.1           | 19'034.8           |
| <b>Total, production and processing</b> | <b>5'971'944.2</b> | <b>3'322'429.1</b>        | <b>3'528'440.6</b> | <b>4'181'233.0</b>   | <b>4'607'656.6</b>    | <b>4'676'148.9</b> | <b>8'063'430.5</b> | <b>7'976'581.9</b> |

<sup>a</sup> Frischknecht et al. (2021).

Source: ESU Services, data 2020.

Table S3. Federal subsidies for food production by product groups  
(in 1000 CHF).

| Product group        | Federal subsidies for food production<br>(1000 CHF) |
|----------------------|-----------------------------------------------------|
| Milk                 | 90'769                                              |
| Butter               | 74'926                                              |
| Cream                | 74'850                                              |
| Cheese               | 550'980                                             |
| Other dairy products | 319'509                                             |
| Beef                 | 894'301                                             |
| Pork                 | 158'476                                             |
| Poultry              | 48'016                                              |
| Other meat           | 139'755                                             |
| Eggs                 | 38'602                                              |
| Cereals              | 152'522                                             |
| Potatoes             | 13'203                                              |
| Vegetable fat, oil   | 55'226                                              |
| Sugar                | 51'612                                              |
| Vegetables           | 22'619                                              |
| Fruit                | 10'182                                              |
| Apple juice, cider   | 6'836                                               |
| Wine                 | 39'958                                              |
| <b>Total</b>         | <b>2'742'340</b>                                    |

Source: Schläpfer (2020b), updated figures, data 2020.
